# Supplementary material for: Presynaptic Rac1 controls synaptic strength through the regulation of synaptic vesicle priming
Source: bioRxiv preprint, doi:10.1101/2022.06.29.497712, version 4 (2022-09-28)
Supplement: Fig2 - Source data 1 [file 497712_file11.xlsx]

## Sheet: Panel A2
group	Stim#1	Stim#2	Stim#3	Stim#4	Stim#5	Stim#6	Stim#7	Stim#8	Stim#9	Stim#10	Stim#11	Stim#12	Stim#13	Stim#14	Stim#15	Stim#16	Stim#17	Stim#18	Stim#19	Stim#20	Stim#21	Stim#22	Stim#23	Stim#24	Stim#25	Stim#26	Stim#27	Stim#28	Stim#29	Stim#30	Stim#31	Stim#32	Stim#33	Stim#34	Stim#35	Stim#36	Stim#37	Stim#38	Stim#39	Stim#40	Stim#41	Stim#42	Stim#43	Stim#44	Stim#45	Stim#46	Stim#47	Stim#48	Stim#49
WT	1.23331	1.09812	1.00472	0.857761	0.700278	0.873275	0.68769	0.551126	0.593766	0.610847	0.454707	0.542119	0.649	0.525862	0.532572	0.487338	0.321804	0.437835	0.51577	0.394154	0.430091	0.419744	0.432562	0.404781	0.327378	0.496842	0.51124	0.483202	0.473969	0.400771	0.43813	0.484509	0.3685	0.505356	0.511218	0.515357	0.415155	0.390575	0.46747	0.471998	0.433849	0.451423	0.46013	0.471341	0.325773	0.585952	0.445985	0.53437	0.53205
WT	1.72223	1.71179	1.29472	1.21711	1.1308	0.93821	1.02633	0.806112	0.754522	0.665447	0.576649	0.584267	0.662234	0.718869	0.738438	0.661519	0.597908	0.498463	0.676833	0.714403	0.724423	0.638327	0.45416	0.573041	0.650451	0.620966	0.638056	0.576665	0.652612	0.591884	0.536057	0.617513	0.739575	0.548765	0.66045	0.599084	0.494922	0.664441	0.593846	0.699722	0.604265	0.628134	0.647416	0.577566	0.719694	0.528287	0.615655	0.598825	0.65333
WT	0.885437	0.656984	0.619876	0.570158	0.483207	0.437493	0.394265	0.45224	0.392875	0.394298	0.325407	0.410542	0.35029	0.358311	0.298595	0.385072	0.398152	0.333582	0.308679	0.311269	0.375144	0.384503	0.314219	0.30162	0.343085	0.31066	0.330971	0.350183	0.290941	0.343209	0.268479	0.321651	0.285251	0.350699	0.312526	0.314022	0.309568	0.30638	0.312196	0.303962	0.323818	0.347719	0.327757	0.316844	0.31984	0.319994	0.348784	0.284048	0.312014
WT	1.23737	0.838694	0.815457	0.761863	0.651617	0.536168	0.466259	0.560287	0.525088	0.439695	0.367708	0.422476	0.425698	0.439197	0.469685	0.388659	0.38184	0.406122	0.420819	0.35024	0.348006	0.426867	0.421472	0.312346	0.383325	0.406542	0.330136	0.35042	0.364638	0.352994	0.407271	0.377608	0.472431	0.487161	0.478221	0.366814	0.404473	0.365865	0.4372	0.408223	0.482252	0.468708	0.384549	0.418291	0.467743	0.352153	0.311661	0.436468	0.341113
WT	1.66024	1.44506	1.34589	1.09242	1.08443	0.968209	0.835662	0.84514	0.844512	0.725928	0.726074	0.703721	0.632871	0.588064	0.622827	0.605273	0.659785	0.606288	0.585689	0.569941	0.62169	0.642736	0.680805	0.755402	0.595436	0.668225	0.651576	0.557802	0.528533	0.588036	0.575981	0.645295	0.639124	0.675549	0.630011	0.68051	0.641282	0.684872	0.60901	0.653284	0.60094	0.693965	0.648474	0.515179	0.559735	0.64408	0.759932	0.696605	0.676345
WT	1.96581	1.19751	1.23594	1.0371	1.02245	1.08126	0.858375	0.831704	0.669796	0.816579	0.702771	0.820751	0.761282	0.743109	0.648827	0.678075	0.809545	0.538833	0.578654	0.602568	0.711766	0.603277	0.677338	0.576878	0.676653	0.742151	0.576549	0.707274	0.523461	0.75816	0.562415	0.580502	0.550598	0.66381	0.773668	0.603799	0.6781	0.677819	0.699777	0.632163	0.594432	0.537438	0.684358	0.718572	0.658993	0.583225	0.528891	0.6227	0.681958
WT	0.745265	0.671794	0.509176	0.537182	0.500125	0.424082	0.467478	0.43365	0.431767	0.345664	0.289459	0.37293	0.41574	0.290706	0.371598	0.282298	0.335076	0.333233	0.317182	0.317766	0.324583	0.251577	0.263435	0.329176	0.2733	0.306266	0.260049	0.285553	0.308245	0.340575	0.301873	0.307985	0.320711	0.266489	0.281108	0.264811	0.290034	0.242371	0.310331	0.287696	0.295783	0.27358	0.282972	0.29337	0.276565	0.307419	0.261392	0.339628	0.272031
WT	1.33523	1.26794	1.03552	0.994815	0.958608	0.904087	0.861592	0.868564	0.869876	0.801512	0.695437	0.627584	0.654793	0.677049	0.682508	0.677351	0.720031	0.695847	0.702631	0.744814	0.695431	0.702082	0.621995	0.658396	0.632851	0.595109	0.587329	0.791183	0.69297	0.74681	0.610074	0.579509	0.670743	0.597538	0.62089	0.595762	0.673649	0.547826	0.716999	0.732019	0.689989	0.642793	0.529686	0.718152	0.792436	0.537956	0.629479	0.507994	0.638052
WT	1.18883	1.10209	0.815546	0.748488	0.762711	0.655167	0.598322	0.639835	0.420216	0.492555	0.468434	0.53504	0.701514	0.535377	0.652044	0.642715	0.438866	0.649667	0.415642	0.414094	0.583174	0.568627	0.501074	0.358944	0.571619	0.404545	0.457743	0.582985	0.413762	0.502922	0.414687	0.291275	0.516513	0.419717	0.476104	0.532126	0.639946	0.443873	0.689402	0.717586	0.339428	0.338888	0.565382	0.399078	0.613465	0.594483	0.356601	0.38237	0.471192
WT	1.06527	0.761944	0.769912	0.742697	0.630622	0.616273	0.522839	0.418474	0.521159	0.42672	0.427872	0.368983	0.473395	0.372428	0.456198	0.442057	0.418137	0.360126	0.398929	0.410929	0.40612	0.450983	0.45956	0.346869	0.352286	0.359209	0.454893	0.374531	0.384539	0.504277	0.479629	0.422953	0.387176	0.413191	0.343973	0.382305	0.507533	0.429703	0.441935	0.465706	0.429321	0.378801	0.435792	0.370698	0.405949	0.39386	0.434555	0.385067	0.333112
WT	1.14478	0.808131	0.70746	0.581508	0.572532	0.519483	0.554541	0.431572	0.483459	0.400732	0.428499	0.38773	0.382612	0.368483	0.327757	0.380959	0.397014	0.375628	0.275964	0.369253	0.298643	0.324789	0.372425	0.337676	0.300946	0.308125	0.362923	0.318228	0.313108	0.290098	0.332936	0.366014	0.309211	0.317443	0.317529	0.338565	0.292807	0.331187	0.343059	0.328459	0.413278	0.35528	0.338212	0.280987	0.35854	0.302756	0.294972	0.36481	0.309446
WT	1.4201	1.122	0.911152	0.841264	0.803854	0.737373	0.67751	0.617719	0.663821	0.622825	0.533427	0.546019	0.6672	0.575869	0.533278	0.619782	0.559839	0.536156	0.609113	0.613047	0.641479	0.574179	0.549322	0.611577	0.620925	0.559904	0.64007	0.601322	0.628621	0.606163	0.607172	0.61205	0.648287	0.626589	0.592287	0.576918	0.562165	0.575231	0.632493	0.570625	0.612699	0.623383	0.595932	0.639442	0.633068	0.701722	0.608932	0.588412	0.68289
WT	1.14309	1.058	0.766977	0.807846	0.667256	0.641207	0.551221	0.466939	0.473909	0.502398	0.529112	0.435255	0.474751	0.412745	0.430794	0.331855	0.419735	0.415374	0.395023	0.363872	0.406416	0.417676	0.390741	0.395922	0.422554	0.405152	0.322229	0.433087	0.318399	0.363258	0.317368	0.392041	0.327456	0.391395	0.403507	0.395076	0.373267	0.342155	0.417519	0.406137	0.338939	0.424454	0.385298	0.344871	0.336259	0.355185	0.368263	0.31563	0.366925
WT	0.754789	0.698281	0.631338	0.531538	0.525015	0.466862	0.513423	0.419222	0.324409	0.442784	0.294463	0.397064	0.303471	0.334118	0.340888	0.307509	0.2209	0.235492	0.241979	0.264337	0.23029	0.230645	0.316825	0.307374	0.27659	0.246921	0.241727	0.276882	0.220923	0.251695	0.210243	0.261088	0.244137	0.27057	0.257286	0.251906	0.276089	0.209565	0.249109	0.279278	0.256024	0.21238	0.249286	0.302402	0.322205	0.237719	0.244172	0.205095	0.223337
WT	2.06246	1.92623	1.54075	1.32541	1.04476	0.937322	0.780286	0.786487	0.786083	0.877977	0.70536	0.750894	0.574802	0.630115	0.582517	0.546606	0.635947	0.552014	0.455316	0.580464	0.50542	0.514986	0.592074	0.412146	0.435257	0.631702	0.557668	0.540872	0.461227	0.629603	0.545299	0.61842	0.383282	0.664395	0.4783	0.500092	0.465474	0.503835	0.522647	0.541351	0.529154	0.571931	0.483601	0.531674	0.487474	0.509555	0.57724	0.438853	0.572604
Rac1 KO	3.32582	2.49745	1.90076	1.75867	1.45956	1.30142	1.23306	1.24163	1.28265	1.15372	1.03993	1.12636	1.04878	0.865464	1.0781	0.978477	1.02471	0.970794	0.982191	1.0494	1.03304	1.01837	1.02008	0.996168	0.991753	0.983615	1.0637	1.10705	1.11564	0.998156	0.965048	1.05255	0.921595	0.969846	1.05759	1.07994	1.12797	1.0549	1.04685	1.02352	1.0706	1.0226	1.09945	1.0479	0.991826	1.07211	1.18761	1.07551	1.06861
Rac1 KO	5.79593	3.7226	2.23691	1.7291	2.00472	1.64635	1.44796	1.54144	1.2735	1.08029	1.06745	1.00722	1.03281	1.02877	0.983938	1.11304	0.852023	0.957765	0.926393	1.01216	1.08504	0.975914	1.00152	1.08243	0.926658	0.966605	0.887831	0.990487	1.04627	0.935115	1.01495	1.07197	1.06688	0.966233	0.966902	0.934128	0.903458	1.00703	0.964516	0.964962	1.14105	0.999906	0.828794	1.03856	0.977839	0.784684	0.949065	0.919966	1.11699
Rac1 KO	1.87365	1.40657	1.05931	0.886211	0.853156	0.754725	0.610826	0.584103	0.603699	0.644891	0.565747	0.507095	0.520899	0.563055	0.585109	0.506269	0.659786	0.481716	0.422793	0.576954	0.526763	0.515659	0.559301	0.502759	0.522976	0.615055	0.554858	0.581516	0.547803	0.589886	0.465123	0.642437	0.512639	0.647247	0.53839	0.604072	0.493383	0.651936	0.486679	0.544677	0.49598	0.556542	0.568502	0.601609	0.621864	0.565124	0.562423	0.65244	0.502086
Rac1 KO	2.5574	1.92702	1.57537	1.16251	0.921247	1.00077	0.85507	0.685858	0.849592	0.762465	0.681386	0.650459	0.615194	0.687356	0.607589	0.533682	0.543319	0.598661	0.580888	0.616859	0.512957	0.697407	0.586644	0.560489	0.666466	0.565948	0.502139	0.57375	0.653592	0.579768	0.724815	0.511838	0.540791	0.556552	0.585402	0.504918	0.417621	0.681428	0.54304	0.594975	0.530452	0.541747	0.518265	0.615554	0.575524	0.644044	0.559869	0.500686	0.639218
Rac1 KO	2.56807	1.90565	1.53052	1.41328	1.03907	1.03691	0.964553	1.10558	0.89428	0.825994	0.890694	0.80887	0.711454	0.712896	0.822506	0.738734	0.697063	0.566394	0.737662	0.668594	0.658594	0.783885	0.666198	0.817657	0.641016	0.718765	0.741314	0.801468	0.765849	0.746535	0.864055	0.684846	0.781505	0.661891	0.677519	0.829687	0.748942	0.705436	0.745149	0.799974	0.730095	0.885298	0.771807	0.951147	0.653055	0.817995	0.656494	0.802121	0.873707
Rac1 KO	3.0192	1.89673	1.60601	1.25835	1.08817	0.886189	0.913318	0.876925	0.815604	0.77327	0.795022	0.645393	0.747116	0.617712	0.679042	0.628836	0.640312	0.617138	0.69951	0.648219	0.631866	0.643733	0.625282	0.552035	0.624385	0.653776	0.647971	0.677093	0.655643	0.621062	0.641625	0.712199	0.608323	0.667026	0.719213	0.677312	0.635878	0.763368	0.68402	0.635971	0.651665	0.702966	0.621531	0.741954	0.648924	0.688422	0.701032	0.759805	0.677828
Rac1 KO	1.74547	1.27343	0.891949	0.829916	0.741357	0.678936	0.610656	0.623213	0.54647	0.579572	0.482242	0.464166	0.408528	0.471141	0.461929	0.486782	0.528297	0.461135	0.513141	0.537783	0.501162	0.498671	0.460114	0.46486	0.44267	0.482735	0.58468	0.439548	0.559715	0.492654	0.443549	0.440385	0.46463	0.480277	0.519571	0.503824	0.480498	0.522026	0.531639	0.557073	0.535505	0.521698	0.508159	0.44322	0.551986	0.4863	0.555112	0.528765	0.483605
Rac1 KO	3.09955	1.75978	1.45195	1.05434	1.05997	0.975688	0.87272	0.710698	0.769356	0.674742	0.695675	0.697182	0.62802	0.638145	0.679081	0.654581	0.676113	0.765372	0.698263	0.653074	0.676508	0.723486	0.761752	0.633486	0.740394	0.775446	0.696891	0.681332	0.796496	0.745049	0.768766	0.738353	0.770363	0.723708	0.738034	0.746956	0.703771	0.709179	0.761215	0.758809	0.782855	0.751973	0.723255	0.81283	0.718306	0.759568	0.812412	0.791564	0.663593
Rac1 KO	4.17271	3.14874	2.26745	1.92097	1.74983	1.60936	1.44279	1.24337	1.18904	1.3203	1.11622	1.12345	1.09246	1.17014	1.10591	1.08936	0.998184	0.980007	1.06292	0.971822	1.13255	1.10473	1.0593	1.07065	1.02879	1.09506	0.997121	1.07779	1.02335	1.12358	1.13499	1.05632	1.02889	1.07137	1.00283	1.05171	1.02253	1.11672	1.02299	1.11729	1.05666	1.02532	1.18698	1.25709	1.08539	1.15123	1.04461	1.05124	1.05151
Rac1 KO	5.75927	3.74231	2.50697	1.99414	1.78988	1.80573	1.51082	1.28268	1.33977	1.28432	1.27588	1.28257	1.22992	1.30349	1.24005	1.18085	1.36574	1.20662	1.09496	1.24698	1.21193	1.12654	1.22662	1.20292	1.28368	1.30361	1.2125	1.35461	1.21649	1.31325	1.0761	1.36201	1.15215	1.12578	1.29009	1.17497	1.31571	1.2934	1.27787	1.2851	1.25114	1.2187	1.20435	1.26573	1.2113	1.33818	1.16511	1.19528	1.03883
Rac1 KO	2.58709	1.79803	1.5052	1.31544	1.11087	0.992121	0.97397	0.931202	0.910302	0.835693	0.73996	0.786997	0.875622	0.731676	0.777392	0.722527	0.657693	0.742926	0.702676	0.76081	0.818819	0.702464	0.731934	0.660736	0.734037	0.717919	0.763817	0.80063	0.719239	0.716147	0.649357	0.758034	0.830019	0.661483	0.737534	0.646841	0.818663	0.703523	0.757731	0.724522	0.726316	0.821859	0.726348	0.743992	0.732044	0.745987	0.584885	0.77411	0.795319
Rac1 KO	2.89197	2.19269	1.65422	1.53022	1.35938	1.33439	0.986778	0.996747	0.961437	1.00947	0.923761	0.920753	0.833261	0.848009	0.886222	0.999254	0.99014	0.841819	0.801056	0.850639	1.02588	1.05489	0.878742	0.954278	0.831148	0.854234	0.960434	0.826893	0.97286	0.892451	0.896175	0.865798	0.730839	0.960513	1.09883	0.880411	0.943274	1.07018	0.818728	0.887719	0.933439	1.05902	1.03513	0.920794	0.756705	0.973631	0.969726	0.936824	0.815365
Rac1 KO	2.92133	2.26474	1.43993	1.42145	1.24942	1.20618	0.83735	0.977781	0.723836	0.762989	0.866208	0.736533	0.772914	0.852924	0.689338	0.635843	0.640298	0.777148	0.661712	0.699019	0.72865	0.745366	0.852994	0.78671	0.643849	0.666669	0.721579	0.713942	0.695338	0.687598	0.792324	0.742425	0.741619	0.824856	0.878522	0.692695	0.624463	0.75543	0.748224	0.817663	0.722613	0.742343	0.825212	0.741932	0.710862	0.827655	0.808911	0.745509	0.740357
Rac1 KO	2.55795	2.51228	1.88737	1.58001	1.91207	1.60205	1.36135	1.2094	1.22192	1.13844	1.07038	1.25709	1.01428	1.1034	1.03436	1.01021	1.1443	1.07157	1.02674	1.27664	1.12644	1.04108	1.06867	1.18729	1.3558	1.18638	0.914131	1.01594	1.26992	0.98423	1.01798	1.22414	1.33528	1.11404	1.22249	1.26232	1.04752	1.09807	1.316	1.13635	1.24178	1.14233	1.17971	1.19523	1.15689	1.17778	1.12856	1.20964	1.14624
Rac1 KO	2.23982	1.69623	1.31009	1.09863	1.05924	0.923099	0.868691	0.748317	0.857808	0.731057	0.720896	0.735416	0.794534	0.675509	0.683562	0.702628	0.880436	0.815252	0.686369	0.719695	0.864938	0.758543	0.690916	0.836556	0.805224	0.781459	0.787948	0.712664	0.635059	0.785089	0.664068	0.752313	0.777282	0.709419	0.661676	0.728736	0.735001	0.749225	0.76405	0.738861	0.796824	0.807299	0.667752	0.773851	0.786149	0.609501	0.738002	0.642316	0.764094
[truncated: 1 more columns]

## Sheet: Panel B2
group	Stim#1	Stim#2	Stim#3	Stim#4	Stim#5	Stim#6	Stim#7	Stim#8	Stim#9	Stim#10	Stim#11	Stim#12	Stim#13	Stim#14	Stim#15	Stim#16	Stim#17	Stim#18	Stim#19	Stim#20	Stim#21	Stim#22	Stim#23	Stim#24	Stim#25	Stim#26	Stim#27	Stim#28	Stim#29	Stim#30	Stim#31	Stim#32	Stim#33	Stim#34	Stim#35	Stim#36	Stim#37	Stim#38	Stim#39	Stim#40	Stim#41	Stim#42	Stim#43	Stim#44	Stim#45	Stim#46	Stim#47	Stim#48	Stim#49
WT	1.15578	1.34439	1.39882	1.23819	1.1461	1.12883	0.891282	0.810112	0.725111	0.618038	0.570171	0.644228	0.575198	0.544481	0.471527	0.498801	0.504115	0.454828	0.44351	0.464565	0.439226	0.413902	0.436072	0.400836	0.447148	0.392096	0.418853	0.434517	0.420985	0.395543	0.363044	0.398197	0.405427	0.360123	0.389598	0.360433	0.388228	0.356894	0.375725	0.395758	0.338255	0.359516	0.338288	0.385316	0.354755	0.35789	0.337322	0.337302	0.340997
WT	1.70605	2.01596	1.82569	1.65168	1.41441	1.20116	1.05856	1.01823	0.887982	0.799208	0.747738	0.760004	0.713048	0.645949	0.701388	0.634188	0.6132	0.61015	0.605629	0.585035	0.574695	0.537687	0.518281	0.549347	0.503033	0.504542	0.466696	0.486268	0.456244	0.451399	0.454242	0.480879	0.426458	0.435586	0.413956	0.408134	0.413588	0.385936	0.401522	0.395442	0.427285	0.390677	0.385738	0.380658	0.38201	0.362512	0.336517	0.390615	0.361455
WT	0.842169	0.9477	0.861841	0.79237	0.714204	0.59849	0.556254	0.498346	0.473396	0.442082	0.392993	0.400652	0.363508	0.360728	0.355014	0.361298	0.344391	0.336682	0.344815	0.338277	0.320261	0.321647	0.316942	0.308005	0.305562	0.317252	0.278144	0.288376	0.268638	0.281472	0.272588	0.249021	0.272568	0.253946	0.265716	0.244157	0.238427	0.227809	0.242271	0.255011	0.232023	0.230702	0.234735	0.24085	0.239954	0.227096	0.227862	0.230629	0.228289
WT	1.06378	1.30502	1.14766	0.918313	0.850099	0.750009	0.74687	0.58206	0.557621	0.524246	0.515225	0.513411	0.493276	0.39167	0.464078	0.463059	0.438738	0.387128	0.336661	0.375417	0.417005	0.387917	0.369363	0.370312	0.368149	0.33586	0.330859	0.36133	0.383913	0.282671	0.361381	0.307726	0.303925	0.325248	0.298954	0.304374	0.26421	0.303972	0.371745	0.283704	0.27198	0.302596	0.263221	0.31391	0.307219	0.268931	0.284128	0.307047	0.25161
WT	1.82058	2.17833	1.99665	1.77574	1.53446	1.31777	1.14654	1.05317	0.982098	0.90023	0.833033	0.83858	0.7811	0.728624	0.69281	0.700184	0.6683	0.647826	0.645882	0.597823	0.565683	0.560217	0.570834	0.512753	0.513026	0.526472	0.498846	0.465549	0.487323	0.462979	0.434146	0.449727	0.415621	0.42101	0.427054	0.449582	0.420626	0.421987	0.384144	0.373596	0.408499	0.3934	0.416164	0.393695	0.415071	0.398387	0.393218	0.430737	0.390423
WT	1.70481	1.8777	1.77326	1.58039	1.37505	1.19446	1.02457	0.952535	0.910028	0.838799	0.825905	0.734477	0.726612	0.70411	0.674981	0.67074	0.664578	0.575762	0.591595	0.611907	0.629443	0.510305	0.609435	0.5656	0.59272	0.546227	0.544529	0.475823	0.513215	0.484644	0.485352	0.488216	0.501268	0.479717	0.487178	0.488179	0.504364	0.428546	0.422249	0.431894	0.477612	0.470102	0.454364	0.444109	0.446558	0.434575	0.448126	0.475208	0.452972
WT	0.71716	0.886384	0.825612	0.839427	0.703532	0.686039	0.649791	0.565993	0.538636	0.483169	0.458057	0.449814	0.40663	0.382659	0.401192	0.402596	0.375821	0.334879	0.329679	0.353189	0.344738	0.330551	0.319687	0.32538	0.326767	0.317475	0.272153	0.29816	0.298689	0.318846	0.282855	0.275808	0.305685	0.300907	0.315379	0.296131	0.303037	0.294306	0.281284	0.28147	0.284211	0.286336	0.287653	0.262906	0.274185	0.263874	0.26781	0.243403	0.258175
WT	1.37847	1.79398	1.88821	1.79805	1.65347	1.35609	1.27358	1.18159	1.02789	1.04149	0.884304	0.89039	0.865138	0.782916	0.720709	0.791914	0.800311	0.735158	0.664813	0.6508	0.604355	0.619352	0.63008	0.601808	0.606992	0.553953	0.571704	0.619798	0.514282	0.5419	0.499151	0.509819	0.496786	0.476741	0.504062	0.467413	0.443069	0.466637	0.457302	0.437749	0.4917	0.435856	0.457796	0.469281	0.454901	0.423692	0.429678	0.429984	0.462847
WT	1.0691	1.46654	1.53361	1.40073	1.45993	1.19236	1.13349	1.17342	0.979287	0.865788	0.93605	0.711449	0.911936	0.699811	0.90108	0.608204	0.660055	0.676482	0.733418	0.640189	0.737143	0.569235	0.678297	0.593439	0.56761	0.677466	0.709943	0.752117	0.622593	0.519004	0.508592	0.625563	0.577352	0.564112	0.535474	0.534606	0.663916	0.460277	0.599124	0.467352	0.603211	0.479231	0.670881	0.483078	0.542667	0.551743	0.454112	0.632578	0.479967
WT	1.0619	1.28215	1.23724	1.09586	0.998411	0.769249	0.725613	0.664801	0.598942	0.530474	0.50053	0.518969	0.461978	0.433031	0.452464	0.417201	0.405145	0.374846	0.485011	0.395822	0.38781	0.392717	0.381767	0.372694	0.377476	0.351897	0.371336	0.306739	0.36517	0.308603	0.344842	0.302567	0.351222	0.298215	0.328771	0.290609	0.310334	0.222666	0.262233	0.245028	0.270784	0.270052	0.29374	0.306123	0.268923	0.311449	0.265335	0.216358	0.287132
WT	1.03221	1.19003	0.970253	0.844571	0.792471	0.633225	0.566195	0.524062	0.504811	0.435647	0.395941	0.366142	0.365924	0.336757	0.356618	0.312076	0.298726	0.355455	0.267509	0.285313	0.279785	0.263794	0.288262	0.289367	0.306587	0.290359	0.2475	0.242468	0.277358	0.255469	0.246285	0.261808	0.253417	0.233592	0.288414	0.213577	0.235582	0.242546	0.201846	0.233152	0.233465	0.231404	0.220543	0.235678	0.236906	0.231625	0.222322	0.24569	0.227972
WT	1.32378	1.54778	1.36503	1.14177	1.02514	0.871947	0.747561	0.720335	0.676601	0.643519	0.620498	0.581201	0.586147	0.538034	0.533269	0.532177	0.53182	0.486252	0.494617	0.454471	0.438946	0.438321	0.457407	0.430619	0.441294	0.398471	0.381671	0.405151	0.35086	0.409979	0.369395	0.396754	0.370282	0.372331	0.319441	0.350609	0.342985	0.338104	0.336286	0.314082	0.35762	0.349466	0.351426	0.333227	0.33248	0.334296	0.34458	0.330016	0.343801
WT	1.12657	1.37479	1.25247	1.06835	0.930452	0.863011	0.673226	0.686312	0.621768	0.509597	0.543224	0.470501	0.465669	0.462791	0.448808	0.434534	0.382199	0.419331	0.410533	0.381959	0.331108	0.373376	0.333053	0.343939	0.339786	0.31502	0.302507	0.310423	0.315817	0.306547	0.303349	0.28659	0.248864	0.261118	0.243235	0.25626	0.27351	0.255625	0.256509	0.255699	0.25181	0.251505	0.246677	0.227071	0.244895	0.222348	0.237425	0.260153	0.23408
WT	0.808897	1.05577	0.966875	0.881104	0.789334	0.65153	0.564003	0.495409	0.464617	0.431366	0.406496	0.355236	0.332422	0.341567	0.294395	0.285526	0.316324	0.256499	0.302521	0.277984	0.270518	0.263364	0.279226	0.23795	0.256166	0.220853	0.250853	0.235599	0.223032	0.241172	0.226843	0.224926	0.250512	0.215853	0.206436	0.218488	0.258222	0.218271	0.213909	0.208459	0.21897	0.223763	0.222828	0.232062	0.206672	0.218845	0.203174	0.220646	0.190872
WT	2.21261	2.46294	2.19568	1.70325	1.4413	1.23925	1.1655	1.00488	0.883048	0.802705	0.733219	0.73471	0.680074	0.593499	0.544738	0.587446	0.503949	0.563513	0.542881	0.472766	0.473623	0.444814	0.416941	0.422528	0.414097	0.420116	0.410564	0.406559	0.379713	0.342652	0.330895	0.359759	0.331567	0.383173	0.376084	0.325565	0.421022	0.406241	0.339467	0.308262	0.349865	0.319212	0.334898	0.326919	0.365214	0.349977	0.371042	0.275879	0.374616
Rac1 KO	3.38463	3.51822	2.9733	2.21617	1.92549	1.53671	1.39703	1.33854	1.04279	1.02912	0.939978	0.941625	0.880593	0.829542	0.800989	0.80538	0.728443	0.723664	0.651058	0.626041	0.650509	0.615453	0.612095	0.63667	0.53607	0.530502	0.51373	0.49457	0.490244	0.512285	0.47483	0.468982	0.450699	0.414027	0.437679	0.379548	0.44726	0.408395	0.381261	0.367398	0.397154	0.346878	0.385675	0.343902	0.38223	0.384661	0.368449	0.338675	0.402022
Rac1 KO	5.22371	4.32468	2.87488	2.06718	1.64243	1.3858	1.14744	0.998572	0.863799	0.816555	0.817517	0.717484	0.620829	0.659098	0.612185	0.588642	0.564492	0.528037	0.466198	0.442771	0.440524	0.3781	0.419068	0.347799	0.355465	0.310747	0.335483	0.321471	0.298321	0.261538	0.287205	0.293404	0.268465	0.271115	0.254043	0.286488	0.251656	0.261466	0.285282	0.244838	0.287633	0.221083	0.251597	0.250079	0.247014	0.245772	0.252358	0.278047	0.241609
Rac1 KO	1.56195	1.58165	1.34354	1.06281	0.934824	0.796459	0.686423	0.653114	0.532244	0.55749	0.48343	0.478872	0.438603	0.440816	0.446898	0.407194	0.421313	0.418068	0.421537	0.398282	0.406153	0.387012	0.374906	0.353772	0.349148	0.386794	0.331897	0.303137	0.346997	0.316259	0.30807	0.295538	0.301408	0.295366	0.305784	0.297607	0.278114	0.306567	0.265956	0.285754	0.300458	0.284688	0.286888	0.298252	0.285417	0.288766	0.299003	0.290432	0.307843
Rac1 KO	2.56175	2.49082	2.12739	1.57746	1.35011	1.06748	0.951482	0.787041	0.745763	0.699348	0.665814	0.582661	0.540598	0.549617	0.52237	0.47181	0.452494	0.410025	0.44981	0.42226	0.411011	0.38777	0.4185	0.436438	0.319484	0.33785	0.341987	0.360762	0.326803	0.323274	0.351295	0.338307	0.263278	0.269126	0.282153	0.269625	0.277072	0.272732	0.260553	0.265247	0.239365	0.292466	0.274481	0.247307	0.243852	0.26827	0.214321	0.278898	0.254859
Rac1 KO	2.34554	2.48388	2.30122	1.94036	1.55678	1.41062	1.27797	1.15586	1.03708	1.0021	0.9321	0.877802	0.888337	0.816392	0.790243	0.750896	0.691658	0.715931	0.709394	0.653108	0.616808	0.601342	0.626372	0.596108	0.600334	0.563703	0.531893	0.510819	0.527554	0.519584	0.468993	0.431485	0.469566	0.480583	0.446254	0.42396	0.424303	0.471151	0.432933	0.45085	0.398042	0.425729	0.446892	0.422563	0.392646	0.429597	0.388422	0.42583	0.470042
Rac1 KO	3.12382	2.88686	2.28784	1.79106	1.4131	1.14075	1.03807	0.932603	0.837202	0.717964	0.666504	0.681342	0.61172	0.545702	0.554359	0.502425	0.487741	0.468841	0.447912	0.465062	0.429984	0.398945	0.383034	0.340516	0.317157	0.335894	0.331954	0.294554	0.283358	0.276945	0.272148	0.248418	0.249445	0.252375	0.244283	0.229285	0.254976	0.233209	0.254503	0.267177	0.234915	0.250285	0.236667	0.249708	0.240807	0.254793	0.258325	0.248528	0.263667
Rac1 KO	1.78344	1.84732	1.35912	1.11627	0.929469	0.849572	0.658355	0.650801	0.510322	0.569906	0.542491	0.468237	0.451576	0.431614	0.425001	0.398174	0.397138	0.38721	0.381947	0.324006	0.299887	0.319746	0.297494	0.325183	0.284973	0.280907	0.329071	0.2417	0.240029	0.276277	0.277837	0.260615	0.312316	0.291637	0.258166	0.245402	0.247356	0.26881	0.274545	0.175513	0.285959	0.234015	0.202864	0.196359	0.214467	0.220802	0.229703	0.233114	0.243045
Rac1 KO	3.04887	2.39662	1.88514	1.51331	1.1303	1.08088	0.944494	0.78975	0.736639	0.691067	0.701545	0.619048	0.646049	0.544815	0.611225	0.516036	0.499131	0.56857	0.577657	0.437337	0.471629	0.498829	0.465824	0.436672	0.404668	0.387383	0.434731	0.40075	0.39261	0.443665	0.353675	0.372316	0.360521	0.340338	0.372905	0.347538	0.39876	0.358969	0.331707	0.370246	0.345932	0.338978	0.301298	0.333104	0.338973	0.371614	0.35242	0.347996	0.318748
Rac1 KO	4.13141	4.27862	3.30337	2.45591	1.9548	1.603	1.41545	1.1466	1.07807	1.01443	0.906421	0.868764	0.793666	0.719156	0.74067	0.676822	0.618687	0.649376	0.585758	0.592224	0.592048	0.528726	0.528109	0.49707	0.481199	0.486192	0.432479	0.459413	0.453198	0.431313	0.425357	0.396366	0.421731	0.428165	0.398058	0.422045	0.434765	0.429074	0.40765	0.441966	0.428875	0.424879	0.407376	0.431171	0.431173	0.440032	0.426475	0.456432	0.440311
Rac1 KO	5.2847	4.9243	3.43132	2.65159	2.10449	1.6511	1.3268	1.39978	1.11239	0.948741	0.91729	1.05675	0.759884	0.695908	0.78687	0.670165	0.728505	0.494121	0.52092	0.549077	0.552672	0.453267	0.394552	0.392096	0.412969	0.40536	0.356261	0.336874	0.432501	0.359367	0.32863	0.3732	0.428298	0.358587	0.387776	0.386516	0.351111	0.354995	0.348623	0.36599	0.355026	0.31225	0.399408	0.436885	0.405196	0.391194	0.36653	0.371524	0.371933
Rac1 KO	2.42841	2.60955	2.12918	1.91306	1.46224	1.29621	1.10365	1.01343	0.947529	0.841242	0.750209	0.734051	0.76545	0.681056	0.659063	0.661054	0.670485	0.610991	0.615012	0.615704	0.589871	0.596358	0.575797	0.523652	0.540619	0.539575	0.541084	0.466526	0.487031	0.489731	0.462108	0.472979	0.457682	0.450173	0.4175	0.416325	0.423891	0.397813	0.437196	0.413461	0.412068	0.405588	0.404798	0.397957	0.396446	0.399815	0.413923	0.409575	0.410743
Rac1 KO	2.65122	2.56104	2.12214	1.65945	1.46068	1.09238	0.915536	0.892218	0.80466	0.831484	0.694525	0.713688	0.669361	0.613672	0.612536	0.562516	0.527798	0.522236	0.498357	0.514292	0.493752	0.485455	0.477297	0.417446	0.495983	0.406943	0.412756	0.439217	0.416985	0.360807	0.368891	0.32486	0.395455	0.296397	0.360801	0.364641	0.301842	0.329025	0.320692	0.305733	0.3606	0.36515	0.322133	0.306787	0.317517	0.321179	0.328971	0.321954	0.355605
Rac1 KO	2.92092	3.07055	2.35172	1.80942	1.53757	1.16671	0.989099	0.903653	0.822198	0.775702	0.678598	0.690667	0.664581	0.616224	0.555027	0.596492	0.557024	0.535456	0.527421	0.531215	0.491587	0.47357	0.502794	0.435287	0.504847	0.474905	0.423137	0.424453	0.362444	0.409801	0.34275	0.361984	0.371479	0.361192	0.363863	0.312795	0.30827	0.328233	0.323539	0.284594	0.335332	0.310369	0.301582	0.303409	0.316387	0.323606	0.31544	0.31542	0.284167
Rac1 KO	2.13669	2.34318	1.76292	1.55248	1.23349	0.980384	0.894321	0.765845	0.69147	0.611757	0.585752	0.527998	0.491013	0.495769	0.418904	0.449312	0.41816	0.448663	0.367938	0.365699	0.403904	0.34044	0.36941	0.339448	0.351961	0.355316	0.302321	0.304204	0.280086	0.292068	0.298962	0.27964	0.244212	0.284146	0.259285	0.291884	0.266922	0.237547	0.247322	0.222571	0.24202	0.253349	0.255414	0.212643	0.259564	0.251249	0.234079	0.267748	0.244171
Rac1 KO	2.35794	2.49961	2.07864	1.58449	1.39156	1.11539	0.985918	0.830272	0.76446	0.701149	0.689715	0.605271	0.556292	0.540252	0.487052	0.551492	0.503086	0.470147	0.458469	0.471643	0.458093	0.462748	0.431298	0.457404	0.390264	0.401435	0.380929	0.361146	0.3674	0.365321	0.354976	0.338128	0.370583	0.343404	0.325264	0.353543	0.305688	0.347553	0.342196	0.330355	0.347158	0.354025	0.361184	0.333763	0.355274	0.318495	0.331869	0.37381	0.3351
[truncated: 1 more columns]

## Sheet: Panel D1
group	Amplitude EPSC1	Steady state 50 Hz	Steady state 500 Hz
WT	1.15578	0.472152	0.345442
WT	1.70605	0.610555	0.378959
WT	0.842169	0.322051	0.232306
WT	1.06378	0.414793	0.282327
WT	1.82058	0.64629	0.4015
WT	1.70481	0.624735	0.452258
WT	0.71716	0.289768	0.26924
WT	1.37847	0.646223	0.445935
WT	1.0691	0.473374	0.539921
WT	1.0619	0.402839	0.271413
WT	1.03221	0.330558	0.232944
WT	1.32378	0.627799	0.340547
WT	1.12657	0.364093	0.241375
WT	0.808897	0.250216	0.21508
WT	2.21261	0.520616	0.340829
Rac1 KO	3.38463	1.07247	0.371585
Rac1 KO	5.22371	0.971305	0.253399
Rac1 KO	1.56195	0.570119	0.293237
Rac1 KO	2.56175	0.575649	0.260743
Rac1 KO	2.34554	0.798088	0.427692
Rac1 KO	3.12382	0.68011	0.248524
Rac1 KO	1.78344	0.521154	0.230308
Rac1 KO	3.04887	0.748547	0.338821
Rac1 KO	4.13141	1.10847	0.43205
Rac1 KO	5.2847	1.21871	0.374416
Rac1 KO	2.42841	0.736033	0.408376
Rac1 KO	2.65122	0.924795	0.329167
Rac1 KO	2.92092	0.772455	0.310082
Rac1 KO	2.13669	1.16239	0.247382
Rac1 KO	2.35794	0.745242	0.346881

## Sheet: Panel D2
group	RRP SMN	RRP NpRf	RRP EQ
WT	14.2922	14.6453	14.1293
WT	19.3423	18.2212	17.2698
WT	9.37317	9.41924	9.69555
WT	11.4412	10.8787	10.8343
WT	19.8706	20.1514	18.9961
WT	17.3055	17.6395	17.216
WT	10.4785	10.8878	12.484
WT	23.0802	23.7555	21.8364
WT	22.035	21.673	24.046
WT	12.4796	12.0022	12.076
WT	8.92313	8.79433	9.6979
WT	13.3802	13.1119	12.7969
WT	12.8946	12.3318	14.0509
WT	9.07546	8.85734	9.04238
WT	18.2598	17.8069	16.7424
Rac1 KO	26.6336	23.4214	21.6915
Rac1 KO	24.9648	21.4344	19.7276
Rac1 KO	11.2563	10.6907	11.34
Rac1 KO	17.7055	16.2713	15.2279
Rac1 KO	21.9361	21.9685	21.3429
Rac1 KO	19.2437	18.2795	16.7614
Rac1 KO	13.0698	11.2919	10.3237
Rac1 KO	16.4026	14.7284	14.4746
Rac1 KO	24.2315	22.6532	22.4004
Rac1 KO	26.6388	26.1018	24.1253
Rac1 KO	19.6785	17.8241	18.202
Rac1 KO	18.389	17.143	16.3727
Rac1 KO	20.2668	16.7882	17.0172
Rac1 KO	15.686	14.1796	14.2054
Rac1 KO	16.067	15.2151	15.8714

## Sheet: Panel D3
group	Pr SMN	Pr NpRf	Pr EQ
WT	0.0808681	0.0768453	0.0817999
WT	0.0882028	0.091585	0.0987878
WT	0.0898489	0.0880505	0.0868614
WT	0.0929773	0.095561	0.0981861
WT	0.0916219	0.0883172	0.0958399
WT	0.0985125	0.0949648	0.0990247
WT	0.0684412	0.0644976	0.0574462
WT	0.0597252	0.056497	0.0631272
WT	0.048518	0.0480727	0.0444604
WT	0.0850906	0.0861458	0.0879342
WT	0.115678	0.114634	0.106436
WT	0.0989359	0.0991163	0.103446
WT	0.0873671	0.0891939	0.0801774
WT	0.0891301	0.0877685	0.0894562
WT	0.121173	0.121292	0.132156
Rac1 KO	0.127081	0.142321	0.156035
Rac1 KO	0.209243	0.24436	0.264791
Rac1 KO	0.138763	0.144011	0.137738
Rac1 KO	0.144686	0.162631	0.168227
Rac1 KO	0.106926	0.105439	0.109898
Rac1 KO	0.16233	0.173313	0.18637
Rac1 KO	0.136455	0.155934	0.172751
Rac1 KO	0.185877	0.203651	0.210636
Rac1 KO	0.170498	0.177477	0.184435
Rac1 KO	0.198384	0.207178	0.219052
Rac1 KO	0.123405	0.13364	0.133415
Rac1 KO	0.144174	0.158562	0.161929
Rac1 KO	0.144124	0.169739	0.171645
Rac1 KO	0.136217	0.147023	0.150414
Rac1 KO	0.146757	0.151112	0.148566

## Sheet: statistics
Panel	Parameter	Rac1+/+ (mean±std)	Rac1-/- (mean±std)	Rac1+/+ (median [1st, 3rd quartile])	Rac1-/- (median [1st, 3rd quartile])	test statistics	n	p	effect size	statistical test	notes
Panel D1	amplitude 1st EPSC	1.27 ± 0.42	3 ± 1.11	1.13 [1.04, 1.62]	2.65 [2.35, 3.32]	t(17.9) = -5.6	15/15	2.53212e-05	U1 = 0.77	t-test
Panel B3	PPR 500 Hz	1.2 ± 0.08	0.99 ± 0.09	1.2 [1.16, 1.23]	1.04 [0.94, 1.06]	U = 225	15/15	6.78364e-06	U1 = 1	Mann-Whitney U
Panel D1	Steady-state EPSC 50 Hz	0.47 ± 0.14	0.84 ± 0.22	0.47 [0.34, 0.62]	0.77 [0.69, 1.05]	t(23.5) = -5.5	15/15	2.63698e-05	U1 = 0.73	t-test	Bonferroni-corrected
Panel D1	Steady-state EPSC 500 Hz	0.33 ± 0.1	0.32 ± 0.07	0.34 [0.25, 0.4]	0.33 [0.26, 0.37]	t(25.3) = 0.3	15/15	0.99	U1 = 0.13	t-test	Bonferroni-corrected
Panel D2	RRP SMN	14.82 ± 4.81	19.48 ± 4.71	13.38 [10.72, 19.07]	19.24 [16.15, 23.66]	t(28) = -2.7	15/15	0.0362659	U1 = 0.27	t-test	Bonferroni-corrected
Panel D2	RRP NpRf	14.68 ± 4.87	17.87 ± 4.48	13.11 [10.88, 18.12]	17.14 [14.85, 21.83]	t(27.8) = -1.9	15/15	0.217897	U1 = 0.13	t-test	Bonferroni-corrected
Panel D2	RRP EQ	14.73 ± 4.53	17.27 ± 4	14.05 [11.14, 17.26]	16.76 [14.66, 20.94]	t(27.6) = -1.6	15/15	0.342335	U1 = 0.13	t-test	Bonferroni-corrected
Panel D3	Pr SMN	0.09 ± 0.02	0.15 ± 0.03	0.09 [0.08, 0.1]	0.14 [0.14, 0.17]	t(24.2) = -7.3	15/15	2.02519e-07	U1 = 0.9	t-test	Bonferroni-corrected
Panel D3	Pr NpRf	0.09 ± 0.02	0.17 ± 0.03	0.09 [0.08, 0.1]	0.16 [0.14, 0.18]	t(22.4) = -7.8	15/15	5.41187e-08	U1 = 0.9	t-test	Bonferroni-corrected
Panel D3	Pr EQ	0.09 ± 0.02	0.17 ± 0.04	0.09 [0.08, 0.1]	0.17 [0.15, 0.19]	t(22) = -7.3	15/15	1.6084e-07	U1 = 0.93	t-test	Bonferroni-corrected
